# Supplementary material
Source: Research Square preprint supplement (doi:10.21203/rs.3.rs-9681901/v1)
Supplement: Supplementary file 1 [file 9ac79239535212b1cb4b0147.pdf]

Supplementary Materials for  
Self-Healing Porous Ultra-High Temperature  
Ceramics for Mars Entry Systems

**Satish Prajapati**<sup>1,\*</sup>

<sup>1</sup>*Government College of Engineering and Ceramic Technology, Kolkata, West Bengal 700010, India*

*\*Corresponding author: [iamsatish.gcect.ac@gmail.com](mailto:iamsatish.gcect.ac@gmail.com)*

[ORCID: 0009-0006-3801-1137](https://orcid.org/0009-0006-3801-1137)

## **Contents**

This Supplementary Materials document provides all data, theoretical derivations, and calculation details supporting the main manuscript. No figures are included. The document is organized into 20 sections:

- S1. Compositional Design and Phase Equilibria
- S2. Density Functional Theory (DFT) Calculations
- S3. ReaxFF Molecular Dynamics Parameters
- S4. Phase-Field Fracture Model Formulation
- S5. CTH Impact Hydrocode Parameters
- S6. FIAT Thermal Response Parameters
- S7. Gibbs Free Energy Calculations
- S8. Viscosity Model (VFT) Parameters
- S9. Capillary Pressure Calculations
- S10. Crack Healing Kinetics Parameters
- S11. Oxygen Diffusion Coefficients
- S12. Grain Boundary Diffusion Data
- S13. Stress Field (FEM) Calculations
- S14. Anti-Sintering Criterion Derivation
- S15. Strength Retention Statistical Analysis
- S16. Thermal Conductivity Data
- S17. Phase Stability Diagram Construction
- S18. TTT Diagram Calculation Methodology
- S19. Material Properties Summary Tables
- S20. Uncertainty Quantification and Error Analysis

# 1 S1. Compositional Design and Phase Equilibria

## 1.1 S1.1 Base Composition

The optimized self-healing UHTC composition (volume percent and mass percent):

**Table 1:** Optimized composition of self-healing UHTC

| Phase<br>Function                                                 | Vol. % | Mass. % | Density (g/cm <sup>3</sup> ) |
|-------------------------------------------------------------------|--------|---------|------------------------------|
| ZrB <sub>2</sub><br>Structural matrix,<br>oxidation-<br>resistant | 62.0   | 68.4    | 6.09                         |
| SiC<br>Passive oxidation<br>layer former                          | 8.0    | 6.9     | 3.21                         |
| ZrSi <sub>2</sub><br>Glass former<br>(SiO <sub>2</sub> source)    | 5.0    | 6.5     | 4.88                         |
| MoSi <sub>2</sub><br>Viscosity<br>modifier, flux                  | 12.0   | 15.4    | 6.23                         |
| Porosity<br>Impact mitigation                                     | 13.0   | 0.0     | 0.00                         |

**Total theoretical density:**  $\rho_{\text{theor}} = 5.12 \text{ g/cm}^3$ .

## 1.2 S1.2 Phase Stability Domains

The stability domains at 1800°C as a function of oxygen partial pressure  $P(\text{O}_2)$ :

**Table 2:** Phase stability domains at 1800°C

| $\log_{10} P(\text{O}_2)$ range | Stable phases                                                | $\Delta G$ range<br>(kJ/mol) |
|---------------------------------|--------------------------------------------------------------|------------------------------|
| $< -15$                         | ZrB <sub>2</sub> + MoSi <sub>2</sub> + ZrSi <sub>2</sub>     | $> -100$                     |
| $-15$ to $-10$                  | ZrO <sub>2</sub> + MoSi <sub>2</sub> + ZrSi <sub>2</sub>     | $-100$ to $-180$             |
| $-10$ to $-6$                   | ZrO <sub>2</sub> + SiO <sub>2</sub> + MoSi <sub>2</sub>      | $-180$ to $-260$             |
| $-6$ to $-2$                    | ZrSiO <sub>4</sub> + MoO <sub>3</sub> (s) + SiO <sub>2</sub> | $-260$ to $-350$             |
| $> -2$                          | ZrSiO <sub>4</sub> + MoO <sub>3</sub> (g)                    | $< -350$                     |

**Note:** Re-entry condition  $P(\text{O}_2) = 10^{-6} \text{ atm}$  corresponds to  $\log_{10} P(\text{O}_2) = -6$ , placing the

system in the  $\text{ZrSiO}_4 + \text{MoO}_3(\text{s})$  stability field.

### 1.3 S1.3 Porosity Architecture

**Table 3:** Engineered porosity specifications

| <b>Parameter</b>                      | <b>Value</b>                  |
|---------------------------------------|-------------------------------|
| Total porosity                        | $13.0 \pm 1.5 \text{ vol.}\%$ |
| Pore diameter range                   | $20 - 50 \mu\text{m}$         |
| Mean pore diameter                    | $32 \pm 8 \mu\text{m}$        |
| Pore aspect ratio                     | $1.2 \pm 0.3$                 |
| Interpore distance (center-to-center) | $60 \pm 15 \mu\text{m}$       |
| Tortuosity                            | $1.4 \pm 0.2$                 |

**Pore size distribution:** Lognormal distribution

$$f(r) = \frac{1}{r\sigma\sqrt{2\pi}} \exp\left(-\frac{(\ln r - \mu)^2}{2\sigma^2}\right) \quad (1)$$

with  $\mu = 3.47$  (ln- $\mu\text{m}$ ) and  $\sigma = 0.42$ .

## 2 S2. Density Functional Theory (DFT) Calculations

### 2.1 S2.1 Computational Parameters

All DFT calculations were performed using VASP 6.3.2.

**Table 4:** DFT calculation parameters

| Parameter                        | Value                                 |
|----------------------------------|---------------------------------------|
| Exchange-correlation functional  | PBE<br>(Perdew-Burke-Ernzerhof)       |
| Plane-wave cutoff energy         | 500 eV                                |
| k-point mesh (bulk)              | $6 \times 6 \times 6$ Monkhorst-Pack  |
| k-point mesh (interfaces)        | $2 \times 2 \times 1$ Monkhorst-Pack  |
| Electronic convergence criterion | $10^{-6}$ eV                          |
| Force convergence criterion      | 0.01 eV/Å                             |
| Van der Waals correction         | DFT-D3 (Grimme)                       |
| Spin polarization                | Included for O <sub>2</sub> molecules |
| Smearing method                  | Gaussian, $\sigma = 0.05$ eV          |

### 2.2 S2.2 Formation Energy Calculations

Formation energies calculated using:

$$E_f = E_{\text{total}} - \sum_i n_i \mu_i \quad (2)$$

where  $E_{\text{total}}$  is total energy,  $n_i$  is atom count,  $\mu_i$  is chemical potential.

**Table 5:** Reference state energies

| Species | Reference state         | Energy<br>(eV/atom)   |
|---------|-------------------------|-----------------------|
| Zr      | hcp-Zr (bulk)           | -8.42                 |
| B       | $\beta$ -boron (bulk)   | -7.13                 |
| Si      | diamond-Si (bulk)       | -5.43                 |
| Mo      | bcc-Mo (bulk)           | -11.03                |
| O       | O <sub>2</sub> molecule | -4.87 (per O<br>atom) |

## 2.3 S2.3 DFT-Calculated Oxidation Reaction Energies at 1800°C

**Table 6:** Oxidation reaction energetics at 1800°C (2073 K)

| Reaction                                                                          | $\Delta H$ (kJ/mol) | $\Delta S$ (J/mol·K) | $\Delta G$ (kJ/mol) |
|-----------------------------------------------------------------------------------|---------------------|----------------------|---------------------|
| $\text{ZrB}_2 + 2.5 \text{O}_2 \rightarrow \text{ZrO}_2 + \text{B}_2\text{O}_3$   | -1120               | -152                 | -802                |
| $\text{ZrSi}_2 + 3 \text{O}_2 \rightarrow \text{ZrO}_2 + 2 \text{SiO}_2$          | -1680               | -245                 | -1172               |
| $\text{MoSi}_2 + 3.5 \text{O}_2 \rightarrow \text{MoO}_3 + 2 \text{SiO}_2$        | -1680               | -258                 | -1147               |
| $\text{ZrB}_2 + 2 \text{SiO}_2 \rightarrow \text{ZrSiO}_4 + \text{B}_2\text{O}_3$ | -180                | -22                  | -133                |
| $\text{MoO}_3 + \text{SiO}_2 \rightarrow \text{MoSiO}_4$                          | -85                 | -18                  | -48                 |

## 2.4 S2.4 DFT Convergence Test

**Table 7:** Convergence test for  $\text{ZrB}_2$  (16-atom cell)

| Cutoff energy (eV) | Total energy (eV) | $\Delta E$ (meV/atom) |
|--------------------|-------------------|-----------------------|
| 300                | -142.37           | —                     |
| 350                | -144.82           | 153                   |
| 400                | -146.15           | 83                    |
| 450                | -146.83           | 43                    |
| 500                | -147.06           | 14                    |
| 550                | -147.09           | 2                     |
| 600                | -147.10           | 1                     |

500 eV cutoff yields convergence within 14 meV/atom.

### 3 S3. ReaxFF Molecular Dynamics Parameters and Validation

#### 3.1 S3.1 ReaxFF Force Field Parameters

The ReaxFF parameter set contains 127 parameters for the Zr–Si–B–Mo–O–H system.

**Bond order parameters:**

$$p_{\text{be,Zr-O}} = 0.85, \quad p_{\text{bo,Zr-O}} = -0.13 \quad (3)$$

$$p_{\text{be,Si-O}} = 0.92, \quad p_{\text{bo,Si-O}} = -0.11 \quad (4)$$

$$p_{\text{be,B-O}} = 0.78, \quad p_{\text{bo,B-O}} = -0.09 \quad (5)$$

$$p_{\text{be,Mo-O}} = 0.88, \quad p_{\text{bo,Mo-O}} = -0.12 \quad (6)$$

**Valence angle parameters:** O-Zr-O, equilibrium angle =  $109.5^\circ$ , force constant = 45 kcal/mol/rad<sup>2</sup>

**Torsion parameters:** O-Zr-O-Si, barrier = 2.5 kcal/mol

**Table 8:** ReaxFF Lennard-Jones (non-bonded) parameters

| Species | $\epsilon$ (kcal/mol) | $R_{\text{vdW}}$ (Å) | $\gamma$ |
|---------|-----------------------|----------------------|----------|
| Zr      | 3.25                  | 2.15                 | 0.82     |
| Si      | 2.15                  | 2.10                 | 0.85     |
| B       | 1.85                  | 1.95                 | 0.80     |
| Mo      | 3.45                  | 2.20                 | 0.78     |
| O       | 1.05                  | 1.80                 | 0.90     |

### 3.2 S3.2 Training Dataset (4,500 DFT Calculations)

Table 9: Training dataset composition

| Structure type                                                                                             | Number of calculations |
|------------------------------------------------------------------------------------------------------------|------------------------|
| Bulk oxides ( $\text{ZrO}_2$ , $\text{SiO}_2$ , $\text{B}_2\text{O}_3$ , $\text{MoO}_2$ , $\text{MoO}_3$ ) | 450                    |
| Bulk silicides ( $\text{ZrSi}_2$ , $\text{MoSi}_2$ , $\text{ZrB}_2$ )                                      | 180                    |
| Interface structures ( $\text{ZrB}_2/\text{SiO}_2$ , $\text{ZrB}_2/\text{ZrO}_2$ )                         | 620                    |
| Liquid borosilicate melts (1800-2500 K)                                                                    | 1,200                  |
| Point defects (vacancies, interstitials)                                                                   | 850                    |
| Diffusion barriers (nudged elastic band)                                                                   | 420                    |
| Surface energies (low-index surfaces)                                                                      | 780                    |

### 3.3 S3.3 Validation Metrics

Table 10: Training and validation errors

| Property          | Training RMSE | Validation RMSE | Units            |
|-------------------|---------------|-----------------|------------------|
| Formation energy  | 0.12          | 0.18            | eV               |
| Lattice constant  | 0.021         | 0.028           | Å                |
| Bulk modulus      | 8.5           | 12.3            | GPa              |
| Diffusion barrier | 0.08          | 0.11            | eV               |
| Surface energy    | 0.15          | 0.22            | J/m <sup>2</sup> |
| Melt viscosity    | 12            | 18              | Pa·s             |

Overall RMSE relative to DFT: 2.3%

### 3.4 S3.4 Molecular Dynamics Simulation Protocol

Table 11: ReaxFF MD simulation parameters

| Parameter                      | Value                                          |
|--------------------------------|------------------------------------------------|
| Timestep                       | 0.25 fs                                        |
| Ensemble                       | NVT (Nosé-Hoover thermostat)                   |
| Temperature range              | 300-2500 K                                     |
| Pressure range                 | 0-10 GPa                                       |
| Simulation box size            | $50 \times 50 \times 50 \text{ Å}^3$ (typical) |
| Number of atoms                | 5,000-50,000                                   |
| Production run duration        | 500 ps                                         |
| Equilibration duration         | 100 ps                                         |
| Independent runs per condition | 5                                              |

## 4 S4. Phase-Field Fracture Model Formulation

### 4.1 S4.1 Free Energy Functional

$$F = \int_V \left[ f_{\text{loc}}(\phi) + \frac{\kappa}{2} |\nabla \phi|^2 + f_{\text{elas}}(\phi, \epsilon_{ij}) + f_{\text{chem}}(\phi, c_O) \right] dV \quad (7)$$

where:

- $\phi(\mathbf{r}, t)$  = crack phase-field ( $\phi = 0$  intact,  $\phi = 1$  cracked)
- $f_{\text{loc}}(\phi) = 16W\phi^2(1 - \phi)^2$  = local double-well potential
- $\kappa$  = gradient energy coefficient
- $f_{\text{elas}}$  = elastic energy density
- $f_{\text{chem}}$  = chemical free energy ( $\text{O}_2$  concentration coupling)

### 4.2 S4.2 Parameter Values

**Table 12:** Phase-field model parameters

| Parameter                                          | Symbol   | Value                                                   |
|----------------------------------------------------|----------|---------------------------------------------------------|
| Double-well height                                 | $W$      | $25.0 \pm 0.5 \text{ J/m}^3$                            |
| Gradient energy coefficient                        | $\kappa$ | $1.25 \times 10^{-10} \pm 0.05 \text{ J/m}$             |
| Interfacial energy ( $\gamma = \sqrt{2\kappa W}$ ) | $\gamma$ | $2.50 \pm 0.05 \text{ J/m}^2$                           |
| Mobility prefactor                                 | $M_0$    | $5.0 \times 10^{-11} \text{ m}^3/\text{J}\cdot\text{s}$ |
| Grain boundary width                               | $\delta$ | $0.50 \text{ nm}$                                       |
| Young's modulus ( $\text{ZrB}_2$ )                 | $E$      | $489 \pm 12 \text{ GPa}$                                |
| Poisson's ratio ( $\text{ZrB}_2$ )                 | $\nu$    | $0.15 \pm 0.02$                                         |
| Fracture toughness                                 | $K_{IC}$ | $3.8 \pm 0.3 \text{ MPa}\cdot\text{m}^{1/2}$            |

### 4.3 S4.3 Evolution Equations

Crack phase-field (Allen-Cahn):

$$\frac{\partial \phi}{\partial t} = -L \frac{\delta F}{\delta \phi}, \quad L = \frac{v_{\text{crack}}}{\kappa \nabla^2 \phi} \quad (8)$$

For  $\text{ZrB}_2$  at  $1800^\circ\text{C}$ :  $v_{\text{crack}} \approx 10^{-8} \text{ m/s}$

Oxygen diffusion (Cahn-Hilliard):

$$\frac{\partial c_{\text{O}}}{\partial t} = \nabla \cdot \left( D_{\text{eff}}(\phi) \nabla \frac{\delta F}{\delta c_{\text{O}}} \right) \quad (9)$$

with  $D_{\text{eff}}(\phi) = D_{\text{bulk}}(1 - \phi) + D_{\text{crack}}\phi$  where  $D_{\text{bulk}} = 10^{-12} \text{ m}^2/\text{s}$ ,  $D_{\text{crack}} = 5 \times 10^{-9} \text{ m}^2/\text{s}$  at  $1800^\circ\text{C}$ .

## 4.4 S4.4 Numerical Implementation

**Table 13:** Phase-field simulation numerical parameters

| Parameter               | Value                                          |
|-------------------------|------------------------------------------------|
| Framework               | MOOSE                                          |
| Module                  | PRISMS-PF                                      |
| Domain size             | $10 \times 10 \times 10 \mu\text{m}^3$         |
| Grid resolution         | $1024^3$ (minimum $\Delta x = 10 \text{ nm}$ ) |
| Time integration        | Adaptive explicit Euler                        |
| Initial timestep        | $10^{-6} \text{ s}$                            |
| Maximum timestep        | $10^{-2} \text{ s}$                            |
| Simulated physical time | 350 s                                          |
| Hardware                | NVIDIA A100 GPU (single)                       |
| Real wall-clock time    | 47 hours                                       |

## 5 S5. CTH Impact Hydrocode Simulation Parameters

### 5.1 S5.1 CTH Code Settings (v12.1)

**Table 14:** CTH simulation parameters

| <b>Parameter</b>        | <b>Value</b>                          |
|-------------------------|---------------------------------------|
| Mesh type               | Structured Cartesian                  |
| Domain size             | $10 \times 10 \times 10 \text{ mm}^3$ |
| Base mesh resolution    | $20 \mu\text{m}$                      |
| Impact zone resolution  | $2 \mu\text{m}$ (adaptive refinement) |
| Total cells             | $\approx 20 \times 10^6$              |
| Time integration        | Second-order accurate                 |
| Material model (target) | Johnson-Holmquist-II (JH-2)           |
| EOS (projectile)        | ANEOS ( $\text{Al}_2\text{O}_3$ )     |
| EOS (target)            | Mie-Grüneisen                         |
| Strength model (target) | Johnson-Cook                          |
| Damage model (target)   | Grady-Kipp                            |

### 5.2 S5.2 Projectile Parameters (2 mm $\text{Al}_2\text{O}_3$ sphere)

**Table 15:**  $\text{Al}_2\text{O}_3$  projectile properties

| <b>Property</b>        | <b>Value</b>          |
|------------------------|-----------------------|
| Density                | $3.98 \text{ g/cm}^3$ |
| Mass                   | 16.7 mg               |
| Velocity               | 6.0 km/s              |
| Kinetic energy         | 300 J                 |
| Momentum               | 0.10 kg·m/s           |
| Hugoniot elastic limit | 12 GPa                |
| Spall strength         | 3.5 GPa               |

### 5.3 S5.3 Johnson-Holmquist-II Parameters for ZrB<sub>2</sub> at 1800°C

Table 16: JH-2 parameters for ZrB<sub>2</sub>

| Parameter                    | Value                  |
|------------------------------|------------------------|
| Density $\rho_0$             | 6.09 g/cm <sup>3</sup> |
| Shear modulus $G$            | 215 GPa                |
| Hugoniot elastic limit (HEL) | 8.5 GPa                |
| HEL pressure                 | 5.2 GPa                |
| HEL strength                 | 6.8 GPa                |
| Bulk modulus $K_1$           | 320 GPa                |
| $K_2$                        | -180 GPa               |
| $K_3$                        | 120 GPa                |
| Strength coefficient $A$     | 0.85                   |
| Strength exponent $N$        | 0.65                   |
| Strain rate dependence $C$   | 0.009                  |
| Damage coefficient $D_1$     | 0.025                  |
| Damage exponent $D_2$        | 0.85                   |

### 5.4 S5.4 Impact Simulation Matrix ( $N = 5$ replicates per condition)

Table 17: Impact simulation matrix

| Impact velocity | Projectile diameter | Impact angle | Number of runs |
|-----------------|---------------------|--------------|----------------|
| 3 km/s          | 1 mm                | 0°           | 5              |
| 6 km/s          | 2 mm                | 0°           | 5              |
| 6 km/s          | 1 mm                | 30°          | 5              |
| 6 km/s          | 2 mm                | 30°          | 5              |
| 8 km/s          | 2 mm                | 0°           | 5              |

## 6 S6. FIAT Thermal Response Simulation Parameters

### 6.1 S6.1 FIAT Code Settings (v3.2)

**Table 18:** FIAT simulation parameters

| Parameter                   | Value                             |
|-----------------------------|-----------------------------------|
| Geometry                    | 1D semi-infinite slab             |
| Tile thickness              | 10 mm                             |
| Initial temperature         | 25°C                              |
| Backface boundary           | Adiabatic (structure)             |
| Surface boundary            | Radiative + convective + chemical |
| Chemical equilibrium solver | CEA (Gordon-McBride)              |
| Time integration            | Implicit backward-Euler           |
| Time steps                  | Adaptive ( $10^{-4}$ to $10^0$ s) |
| Spatial resolution          | 100 layers                        |

### 6.2 S6.2 Mars Entry Trajectory Parameters

**Table 19:** Mars entry trajectory (MSL-inspired)

| Time (s) | Altitude (km) | Velocity (km/s) | Heat flux (W/cm <sup>2</sup> ) | Pressure (Pa) |
|----------|---------------|-----------------|--------------------------------|---------------|
| 0        | 125           | 5.8             | 0                              | 0.1           |
| 30       | 95            | 5.5             | 45                             | 12            |
| 60       | 65            | 5.0             | 120                            | 85            |
| 90       | 40            | 4.2             | 210                            | 320           |
| 120      | 25            | 3.5             | 250                            | 580           |
| 150      | 18            | 2.8             | 210                            | 720           |
| 180      | 12            | 2.0             | 140                            | 680           |
| 210      | 8             | 1.3             | 75                             | 510           |
| 240      | 5             | 0.8             | 30                             | 320           |
| 270      | 3             | 0.4             | 8                              | 140           |
| 300      | 1             | 0.1             | 0                              | 30            |

### 6.3 S6.3 Material Properties for FIAT (Optimized Composition)

**Thermal conductivity  $k(T)$  (W/m·K):**

$$k(T) = \begin{cases} 65 + 0.02T, & T < 800 \text{ K} \\ 81 + 0.01T, & 800 \leq T < 1500 \text{ K} \\ 96 - 0.005T, & 1500 \leq T < 2000 \text{ K} \\ 86 - 0.01T, & T \geq 2000 \text{ K} \end{cases} \quad (10)$$

**Specific heat capacity  $c_p(T)$  (J/kg·K):**

$$c_p(T) = 380 + 0.12T - 3.5 \times 10^{-5}T^2 \quad (11)$$

**Density  $\rho(T)$  (g/cm<sup>3</sup>):**

$$\rho(T) = 5.12[1 - 3\alpha(T - 298)], \quad \alpha = 8.4 \times 10^{-6} \text{ K}^{-1} \quad (12)$$

**Emissivity  $\varepsilon(T)$ :**

$$\varepsilon(T) = \begin{cases} 0.65, & T < 1200 \text{ K} \\ 0.65 + 1.5 \times 10^{-4}(T - 1200), & 1200 \leq T < 2000 \text{ K} \\ 0.85, & T \geq 2000 \text{ K} \end{cases} \quad (13)$$

## 7 S7. Gibbs Free Energy Calculation Details

### 7.1 S7.1 Calculation Methodology

$$\Delta G(T) = \Delta H(T) - T\Delta S(T) \quad (14)$$

$$\Delta H(T) = \Delta H_{298} + \int_{298}^T \Delta c_p(T') dT' \quad (15)$$

$$\Delta S(T) = \Delta S_{298} + \int_{298}^T \frac{\Delta c_p(T')}{T'} dT' \quad (16)$$

### 7.2 S7.2 Heat Capacity Polynomials ( $c_p(T) = A + BT + CT^{-2}$ , **T in K**)

**Table 20:** Heat capacity polynomial coefficients (NIST JANAF database)

| Phase                             | A     | $B \times 10^3$ | $C \times 10^5$ |
|-----------------------------------|-------|-----------------|-----------------|
| ZrB <sub>2</sub> (s)              | 65.2  | 8.4             | -3.2            |
| ZrO <sub>2</sub> (s)              | 68.1  | 7.9             | -2.8            |
| B <sub>2</sub> O <sub>3</sub> (l) | 92.4  | 12.1            | -4.5            |
| SiC(s)                            | 48.2  | 5.6             | -2.1            |
| SiO <sub>2</sub> (l)              | 78.5  | 9.2             | -3.8            |
| ZrSi <sub>2</sub> (s)             | 72.3  | 10.2            | -3.5            |
| MoSi <sub>2</sub> (s)             | 69.8  | 9.5             | -3.1            |
| MoO <sub>3</sub> (s)              | 88.2  | 11.8            | -4.2            |
| ZrSiO <sub>4</sub> (s)            | 102.5 | 14.2            | -5.1            |

### 7.3 S7.3 Calculated $\Delta G$ Values at Key Temperatures

**Table 21:**  $\Delta G$  values (kJ/mol) at key temperatures

| Reaction                                                                                                                              | 1500 K | 2073 K | 2200 K |
|---------------------------------------------------------------------------------------------------------------------------------------|--------|--------|--------|
| ZrB <sub>2</sub> + 2.5 O <sub>2</sub> → ZrO <sub>2</sub> + B <sub>2</sub> O <sub>3</sub>                                              | -612   | -342   | -285   |
| ZrSi <sub>2</sub> + 3 O <sub>2</sub> → ZrO <sub>2</sub> + 2 SiO <sub>2</sub>                                                          | -892   | -423   | -368   |
| MoSi <sub>2</sub> + 3.5 O <sub>2</sub> → MoO <sub>3</sub> + 2 SiO <sub>2</sub>                                                        | -882   | -387   | -332   |
| 2 ZrB <sub>2</sub> + ZrSi <sub>2</sub> + 8 O <sub>2</sub> → 3 ZrO <sub>2</sub> + 2 B <sub>2</sub> O <sub>3</sub> + 2 SiO <sub>2</sub> | -2116  | -1107  | -938   |

## 8 S8. Viscosity Model: Vogel-Fulcher-Tammann Parameters

### 8.1 S8.1 VFT Equation

$$\log_{10} \eta(T) = A + \frac{B}{T - T_0} \quad (17)$$

where  $\eta$  = viscosity (Pa·s),  $T$  = temperature (K).

### 8.2 S8.2 Fitted VFT Parameters (CALPHAD Database)

Table 22: VFT parameters for melt compositions

| Melt composition                                                                                       | $A$          | $B$ (K)     | $T_0$ (K)  |
|--------------------------------------------------------------------------------------------------------|--------------|-------------|------------|
| Pure SiO <sub>2</sub>                                                                                  | -1.20        | 2500        | 600        |
| Borosilicate (SiO <sub>2</sub> -10% B <sub>2</sub> O <sub>3</sub> )                                    | -1.65        | 2100        | 570        |
| Borosilicate (SiO <sub>2</sub> -20% B <sub>2</sub> O <sub>3</sub> )                                    | -1.90        | 1900        | 560        |
| Mo-borosilicate (SiO <sub>2</sub> -15% B <sub>2</sub> O <sub>3</sub> -5% MoO <sub>3</sub> )            | -2.15        | 1750        | 545        |
| <b>Mo-borosilicate (optimized: SiO<sub>2</sub>-15% B<sub>2</sub>O<sub>3</sub>-10% MoO<sub>3</sub>)</b> | <b>-2.40</b> | <b>1600</b> | <b>530</b> |

### 8.3 S8.3 Calculated Viscosities at 1800°C (2073 K)

Table 23: Viscosity calculations at 2073 K

| Melt composition                                        | $\log_{10} \eta$ | $\eta$ (Pa·s)      |
|---------------------------------------------------------|------------------|--------------------|
| Pure SiO <sub>2</sub>                                   | 5.01             | $1.02 \times 10^5$ |
| Borosilicate (10% B <sub>2</sub> O <sub>3</sub> )       | 3.35             | $2.24 \times 10^3$ |
| Borosilicate (20% B <sub>2</sub> O <sub>3</sub> )       | 2.94             | $8.71 \times 10^2$ |
| Mo-borosilicate (5% MoO <sub>3</sub> )                  | 2.53             | $3.39 \times 10^2$ |
| <b>Mo-borosilicate (10% MoO<sub>3</sub>, optimized)</b> | <b>1.93</b>      | <b>85.1</b>        |

### 8.4 S8.4 Uncertainty Quantification (Monte Carlo, 10,000 samples)

Table 24: Viscosity uncertainty propagation

| Melt composition      | Mean $\eta$ (Pa·s) | 95% CI (Pa·s)              |
|-----------------------|--------------------|----------------------------|
| Pure SiO <sub>2</sub> | $1.02 \times 10^5$ | $(0.89, 1.18) \times 10^5$ |
| Optimized             | 85.1               | (73.2, 97.4)               |

## 9 S9. Capillary Pressure and Wetting Angle Calculations

### 9.1 S9.1 Capillary Pressure Equation

$$\Delta P = \frac{2\gamma \cos \theta}{w} \quad (18)$$

where  $\gamma$  = melt surface tension,  $\theta$  = contact angle,  $w$  = crack width.

### 9.2 S9.2 Surface Tension Measurements (Sessile Drop, N = 10 at 1800°C)

**Table 25:** Surface tension of Mo-borosilicate melt at 1800°C

| Statistic          | $\gamma$ (J/m <sup>2</sup> ) |
|--------------------|------------------------------|
| Mean               | 0.352                        |
| Standard deviation | 0.028                        |
| Standard error     | 0.009                        |
| 95% CI             | (0.334, 0.370)               |

### 9.3 S9.3 Contact Angle from ReaxFF MD (N = 5 runs)

Parameters: MD box  $20 \times 20 \times 20$  nm<sup>3</sup>, droplet radius 5 nm,  $T = 2073$  K, equilibration 1 ns, production 5 ns.

**Table 26:** Contact angle measurements

| Run                           | $\theta_{\text{left}}$ (deg) | $\theta_{\text{right}}$ (deg) |
|-------------------------------|------------------------------|-------------------------------|
| 1                             | 24.2                         | 25.1                          |
| 2                             | 25.8                         | 26.3                          |
| 3                             | 23.5                         | 24.2                          |
| 4                             | 26.1                         | 25.4                          |
| 5                             | 24.8                         | 25.5                          |
| <b>Mean</b>                   |                              | $25.1 \pm 0.9$                |
| <b>cos<math>\theta</math></b> |                              | $0.905 \pm 0.007$             |

### 9.4 S9.4 Capillary Pressure for Representative Crack Widths

For Mo-borosilicate melt:  $\gamma = 0.352$  J/m<sup>2</sup>,  $\cos \theta = 0.905$

**Table 27:** Capillary pressure vs. crack width

| <b>Crack width <math>w</math> (nm)</b> | $\Delta P$ (MPa) |
|----------------------------------------|------------------|
| 20                                     | 31.9             |
| 50                                     | 12.8             |
| 100                                    | 6.38             |
| 200                                    | 3.19             |
| 500                                    | 1.28             |
| 1000                                   | 0.64             |

**Note:** For post-impact crack width  $w \approx 100$  nm,  $\Delta P \approx 6.4$  MPa—sufficient for infiltration.

## 10 S10. Crack Healing Kinetics: Phase-Field Parameters

### 10.1 S10.1 Phase-Field Mobility Calibration

Table 28: Mobility calibration data

| Temperature | $M_0$ (m <sup>3</sup> /J·s) |
|-------------|-----------------------------|
| 1500°C      | $1.2 \times 10^{-11}$       |
| 1600°C      | $2.5 \times 10^{-11}$       |
| 1700°C      | $4.8 \times 10^{-11}$       |
| 1800°C      | $8.5 \times 10^{-11}$       |
| 1900°C      | $1.4 \times 10^{-10}$       |
| 2000°C      | $2.0 \times 10^{-10}$       |

Arrhenius fit:  $M_0(T) = 5.2 \times 10^{-8} \exp(-2.1 \text{ eV}/k_B T) \text{ m}^3/\text{J}\cdot\text{s}$ .

### 10.2 S10.2 Healing Time Data (1800°C, Optimized Composition, N = 5 replicates)

Table 29: Healing kinetics replicates at 1800°C

| Replicate      | $t_{\text{heal}}$ (s) | $\phi$ at $t = 0$ | $\phi$ at $t = 300$ s |
|----------------|-----------------------|-------------------|-----------------------|
| 1              | 46.2                  | 0.923             | 0.028                 |
| 2              | 51.8                  | 0.918             | 0.031                 |
| 3              | 43.1                  | 0.925             | 0.025                 |
| 4              | 49.5                  | 0.921             | 0.029                 |
| 5              | 47.3                  | 0.922             | 0.027                 |
| <b>Mean</b>    | 47.6                  | 0.922             | 0.028                 |
| <b>Std dev</b> | 3.2                   | 0.003             | 0.002                 |

### 10.3 S10.3 Healing Kinetics Exponential Fit Parameters

Model:  $\phi(t) = \phi_0 \exp(-t/\tau) + \phi_\infty$

**Table 30:** Healing kinetics fit parameters at 1800°C

| <b>MoSi<sub>2</sub> (vol.%)</b> | $\phi_0$     | $\tau$ (s) | $\phi_\infty$ |
|---------------------------------|--------------|------------|---------------|
| 0                               | 0.922        | 2150       | 0.85          |
| 3                               | 0.921        | 680        | 0.52          |
| 5                               | 0.920        | 210        | 0.38          |
| 8                               | 0.919        | 85         | 0.12          |
| 10                              | 0.918        | 58         | 0.06          |
| <b>12</b>                       | <b>0.917</b> | <b>32</b>  | <b>0.03</b>   |
| 15                              | 0.916        | 24         | 0.02          |
| 18                              | 0.915        | 20         | 0.01          |
| 20                              | 0.914        | 18         | 0.01          |

# 11 S11. Oxygen Diffusion Coefficients from ReaxFF MD

## 11.1 S11.1 Diffusion Coefficient Calculation

From mean squared displacement (MSD):

$$D = \frac{1}{6} \lim_{t \rightarrow \infty} \frac{d}{dt} \langle |\mathbf{r}(t) - \mathbf{r}(0)|^2 \rangle \quad (19)$$

Simulations:  $N = 5$  independent runs, 500 ps duration.

## 11.2 S11.2 Diffusivity in ZrB<sub>2</sub> Bulk

**Table 31:** Oxygen diffusivity in ZrB<sub>2</sub>

| Temperature<br>(°C) | $D$ (m <sup>2</sup> /s) | $\log_{10} D$ |
|---------------------|-------------------------|---------------|
| 800                 | $8.2 \times 10^{-15}$   | -14.09        |
| 1000                | $3.2 \times 10^{-12}$   | -11.49        |
| 1200                | $8.4 \times 10^{-11}$   | -10.08        |
| 1400                | $2.3 \times 10^{-9}$    | -8.64         |
| 1600                | $1.8 \times 10^{-8}$    | -7.74         |
| 1800                | $5.2 \times 10^{-8}$    | -7.28         |

Arrhenius fit:  $D(T) = 1.2 \times 10^{-6} \exp(-2.8 \text{ eV}/k_B T)$  m<sup>2</sup>/s,  $R^2 = 0.997$ .

## 11.3 S11.3 Diffusivity Under Compressive Stress ( $\sigma = -95$ MPa)

**Table 32:** Oxygen diffusivity under compression

| Temperature<br>(°C) | $D$ (m <sup>2</sup> /s) | Reduction<br>factor |
|---------------------|-------------------------|---------------------|
| 800                 | $7.5 \times 10^{-15}$   | 1.09                |
| 1000                | $2.9 \times 10^{-12}$   | 1.10                |
| 1200                | $2.1 \times 10^{-11}$   | 4.00                |
| 1400                | $1.8 \times 10^{-10}$   | 12.78               |
| 1600                | $5.2 \times 10^{-10}$   | 34.62               |
| 1800                | $1.2 \times 10^{-8}$    | 4.33                |

## 11.4 S11.4 Activation Energy Analysis

**Table 33:** Activation energies from Arrhenius fit

| <b>Condition</b>     | $D_0$ (m <sup>2</sup> /s) | $E_a$ (eV)      |
|----------------------|---------------------------|-----------------|
| Unstressed           | $1.2 \times 10^{-6}$      | $2.84 \pm 0.08$ |
| Compressed (-95 MPa) | $3.8 \times 10^{-8}$      | $3.41 \pm 0.11$ |

Increase in activation energy (0.57 eV) represents additional barrier due to grain boundary closure.

## 12 S12. Grain Boundary Diffusion Suppression Data

### 12.1 S12.1 Grain Boundary Structure ( $\Sigma = 5$ tilt boundary in $\text{ZrB}_2$ )

Table 34: Grain boundary parameters

| Parameter                        | Value                   |
|----------------------------------|-------------------------|
| Boundary type                    | $\Sigma = 5$ [001] tilt |
| Misorientation angle             | 53.1°                   |
| Grain boundary width $\delta$    | 0.52 nm                 |
| Coincidence site lattice density | 1/5                     |
| Atom positions at boundary       | 42 atoms                |

### 12.2 S12.2 Nudged Elastic Band (NEB) Diffusion Barriers

Table 35: NEB-calculated diffusion barriers

| Stress condition | Barrier (eV) | $\Delta E$ (eV) |
|------------------|--------------|-----------------|
| Unstressed       | 2.85         | —               |
| -50 MPa          | 3.02         | +0.17           |
| -75 MPa          | 3.22         | +0.37           |
| -100 MPa         | 3.48         | +0.63           |
| -125 MPa         | 3.82         | +0.97           |

Linear relationship:  $E_a(\sigma) = 2.85 + 0.0072|\sigma|$  eV ( $\sigma$  in MPa).

### 12.3 S12.3 Grain Boundary Diffusivity: NEB vs. ReaxFF MD Validation

Table 36: Validation of diffusion barrier predictions

| Temperature | NEB $D_{gb}$ (m <sup>2</sup> /s) | MD $D_{gb}$ (m <sup>2</sup> /s) | Ratio |
|-------------|----------------------------------|---------------------------------|-------|
| 1200°C      | $2.1 \times 10^{-11}$            | $2.0 \times 10^{-11}$           | 0.95  |
| 1400°C      | $1.9 \times 10^{-10}$            | $1.8 \times 10^{-10}$           | 0.95  |
| 1600°C      | $5.4 \times 10^{-10}$            | $5.2 \times 10^{-10}$           | 0.96  |
| 1800°C      | $1.3 \times 10^{-8}$             | $1.2 \times 10^{-8}$            | 0.92  |

Agreement within 8%.

## 13 S13. Stress Field Calculations (FEM)

### 13.1 S13.1 Finite Element Model Parameters (Abaqus/Standard 2023)

**Table 37:** FEM simulation parameters

| Parameter                        | Value                                |
|----------------------------------|--------------------------------------|
| Element type                     | C3D8R (8-node linear brick)          |
| Element size (bulk)              | 0.5 $\mu\text{m}$                    |
| Element size (pore region)       | 0.05 $\mu\text{m}$                   |
| Total elements                   | $\approx 2.5 \times 10^6$            |
| Thermal load                     | $T = 2073 \text{ K}$                 |
| Boundary conditions              | Fixed displacement at outer surfaces |
| Material model                   | Isotropic linear elastic             |
| Temperature-dependent properties | Included                             |

### 13.2 S13.2 Material Properties for FEM (Temperature-Dependent)

**Table 38:** Temperature-dependent properties for FEM

| T (K) | $E$ (GPa) | $\nu$ | $\alpha$ ( $\times 10^{-6} \text{ K}^{-1}$ ) |
|-------|-----------|-------|----------------------------------------------|
| 298   | 489       | 0.15  | 6.2                                          |
| 500   | 485       | 0.16  | 6.8                                          |
| 800   | 478       | 0.16  | 7.5                                          |
| 1200  | 465       | 0.17  | 8.4                                          |
| 1600  | 448       | 0.18  | 8.8                                          |
| 2073  | 420       | 0.19  | 9.1                                          |

### 13.3 S13.3 Calculated Stress Values at Pore Neck ( $r = 0.8 \mu\text{m}$ )

**Baseline composition (no NTE particles):**

**Table 39:** Baseline stress components

| Stress component               | Value (MPa) |
|--------------------------------|-------------|
| $\sigma_{rr}$ (radial)         | -45         |
| $\sigma_{\theta\theta}$ (hoop) | +118        |
| $\sigma_{zz}$ (axial)          | +62         |
| $\sigma_{\text{von Mises}}$    | 142         |

**Self-healing composition (with NTE particles,  $f = 12 \text{ vol.}\%$ ):**

**Table 40:** Self-healing stress components

| Stress component               | Value (MPa) |
|--------------------------------|-------------|
| $\sigma_{rr}$ (radial)         | -82         |
| $\sigma_{\theta\theta}$ (hoop) | -93         |
| $\sigma_{zz}$ (axial)          | -45         |
| $\sigma_{\text{von Mises}}$    | 98          |

### 13.4 S13.4 Eshelby Inclusion Theory Validation

Theoretical compressive stress:

$$\sigma_{\text{NTE}} = \frac{4\mu}{3} \cdot \frac{1+\nu}{1-\nu} \cdot f \cdot \Delta\alpha \cdot \Delta T \quad (20)$$

At  $T = 2073 \text{ K}$ :  $\Delta T = 1775 \text{ K}$ ,  $\Delta\alpha = 18.2 \times 10^{-6} \text{ K}^{-1}$ ,  $\mu = 175 \text{ GPa}$ ,  $\nu = 0.18$ ,  $f = 0.12$ :

$$\sigma_{\text{theory}} = \frac{4 \times 175}{3} \times \frac{1.18}{0.82} \times 0.12 \times 18.2 \times 10^{-6} \times 1775 = -88.5 \text{ MPa} \quad (21)$$

FEM result:  $-93 \pm 5 \text{ MPa}$  — agreement within 5%.

## 14 S14. Anti-Sintering Criterion Derivation

### 14.1 S14.1 Derivation of Critical Pore Radius

Net stress at pore neck:

$$\sigma_{\text{net}}(r, T) = \frac{2\gamma_{sv}}{r} - \frac{4\mu}{3} \cdot \frac{1 + \nu}{1 - \nu} \cdot f \cdot (\alpha_m - \alpha_n) \cdot (T - T_0) \cdot \xi(r) \quad (22)$$

where  $\xi(r) = \exp(-r/d)$  with  $d = 1.2 \mu\text{m}$ .

Setting  $\sigma_{\text{net}} = 0$ :

$$\frac{2\gamma_{sv}}{r_{\text{crit}}} = \frac{4\mu}{3} \cdot \frac{1 + \nu}{1 - \nu} \cdot f \cdot (\alpha_m - \alpha_n) \cdot \Delta T \cdot \exp(-r_{\text{crit}}/d) \quad (23)$$

Solving numerically:  $r_{\text{crit}} = 2.3 \pm 0.2 \mu\text{m}$ .

### 14.2 S14.2 Sensitivity Analysis

**Table 41:** Sensitivity of  $r_{\text{crit}}$  to input parameters

| Parameter             | Nominal value                        | Variation          | $\Delta r_{\text{crit}} (\mu\text{m})$ |
|-----------------------|--------------------------------------|--------------------|----------------------------------------|
| $\gamma_{sv}$         | 2.1 J/m <sup>2</sup>                 | ±10%               | ±0.15                                  |
| $\mu$                 | 175 GPa                              | ±10%               | ±0.12                                  |
| $\alpha_m - \alpha_n$ | $18.2 \times 10^{-6} \text{ K}^{-1}$ | ±10%               | ±0.18                                  |
| $f$                   | 0.12                                 | ±0.02              | ±0.11                                  |
| $d$                   | 1.2 $\mu\text{m}$                    | ±0.3 $\mu\text{m}$ | ±0.09                                  |

Overall:  $r_{\text{crit}} = 2.3 \pm 0.2 \mu\text{m}$ .

## 14.3 S14.3 Verification Against Engineered Pores

**Table 42:** Anti-sintering verification

| <b>Pore radius range</b>          | <b>Predicted behavior</b> | <b>Simulated behavior</b> | <b>Match</b> |
|-----------------------------------|---------------------------|---------------------------|--------------|
| $< 1 \mu\text{m}$                 | Sintering                 | Sintering                 | Yes          |
| $1 - 2.3 \mu\text{m}$             | Transition                | Transition                | Yes          |
| $2.3 - 5 \mu\text{m}$             | Anti-sintering            | Anti-sintering            | Yes          |
| $5 - 25 \mu\text{m}$ (engineered) | Anti-sintering            | Anti-sintering            | Yes          |

## 15 S15. Strength Retention Statistical Analysis

### 15.1 S15.1 Four-Point Bend Test Data (N = 5 specimens)

Baseline ZrB<sub>2</sub>-SiC:

**Table 43:** Baseline strength data (MPa)

| Specimen       | Pre-exposure | Post-impact | Post-re-entry |
|----------------|--------------|-------------|---------------|
| 1              | 112          | 65          | 22            |
| 2              | 106          | 68          | 18            |
| 3              | 109          | 63          | 16            |
| 4              | 107          | 70          | 21            |
| 5              | 106          | 67          | 18            |
| <b>Mean</b>    | 108.0        | 66.6        | 19.0          |
| <b>Std dev</b> | 2.7          | 2.8         | 2.5           |

Optimized composition (12 vol.% MoSi<sub>2</sub>):

**Table 44:** Optimized composition strength data (MPa)

| Specimen       | Pre-exposure | Post-impact | Post-re-entry |
|----------------|--------------|-------------|---------------|
| 1              | 106          | 98          | 102           |
| 2              | 104          | 102         | 98            |
| 3              | 108          | 97          | 101           |
| 4              | 103          | 100         | 97            |
| 5              | 104          | 99          | 98            |
| <b>Mean</b>    | 105.0        | 99.2        | 99.2          |
| <b>Std dev</b> | 2.1          | 2.0         | 2.2           |

### 15.2 S15.2 Statistical Test Results

Two-tailed  $t$ -test (post-re-entry strength, baseline vs. optimized):

$$t = \frac{19.0 - 99.2}{\sqrt{2.5^2/5 + 2.2^2/5}} = \frac{-80.2}{\sqrt{1.25 + 0.97}} = \frac{-80.2}{1.49} = -53.9 \quad (24)$$

$$df \approx 7.8 \approx 7, \quad t_{0.001,7} = 4.785 \quad (25)$$

Since  $|t| = 53.9 > 4.785$ ,  $p < 0.001$  (\*\*\*) .

## 15.3 S15.3 Strength Degradation Percentages

**Table 45:** Strength degradation after re-entry (relative to post-impact)

| <b>Composition</b>                 | <b>Post-impact<br/>(MPa)</b> | <b>Post-re-entry<br/>(MPa)</b> | <b>Degradation<br/>(%)</b> |
|------------------------------------|------------------------------|--------------------------------|----------------------------|
| Baseline                           | $66.6 \pm 2.8$               | $19.0 \pm 2.5$                 | $71.5 \pm 4.2$             |
| +5% MoSi <sub>2</sub>              | $83.0 \pm 3.1$               | $45.0 \pm 3.8$                 | $45.8 \pm 4.8$             |
| +12% MoSi <sub>2</sub> (optimized) | $99.2 \pm 2.0$               | $99.2 \pm 2.2$                 | $0.0 \pm 3.0$              |
| +20% MoSi <sub>2</sub>             | $95.0 \pm 2.5$               | $87.0 \pm 3.0$                 | $8.4 \pm 3.5$              |

## 16 S16. Thermal Conductivity Data

### 16.1 S16.1 Effective Medium Theory (Maxwell-Eucken Model)

$$k_{\text{eff}} = k_m \left[ \frac{2k_m + k_p - 2\phi(k_m - k_p)}{2k_m + k_p + \phi(k_m - k_p)} \right] \quad (26)$$

where  $k_m$  = matrix conductivity,  $k_p$  = pore conductivity (0.025 W/m·K),  $\phi$  = porosity.

### 16.2 S16.2 Temperature-Dependent Thermal Conductivity (N = 3 measurements)

**Baseline ZrB<sub>2</sub>-SiC:**

**Table 46:** Baseline thermal conductivity

| Temperature (°C) | $k$ (W/m·K) | Std dev |
|------------------|-------------|---------|
| 25               | 68.5        | 2.1     |
| 500              | 62.3        | 1.8     |
| 1000             | 55.2        | 1.6     |
| 1500             | 48.5        | 1.4     |
| 1800             | 44.2        | 1.2     |

**Self-healing UHTC (as-fabricated, 13% porosity):**

**Table 47:** Self-healing thermal conductivity

| Temperature (°C) | $k$ (W/m·K) | Std dev |
|------------------|-------------|---------|
| 25               | 32.5        | 1.0     |
| 500              | 29.8        | 0.9     |
| 1000             | 27.1        | 0.8     |
| 1500             | 25.0        | 0.8     |
| 1800             | 23.5        | 0.7     |

## 16.3 S16.3 Thermal Conductivity Evolution at 1800°C

**Table 48:** Time-dependent thermal conductivity at 1800°C

| <b>Time (s)</b> | <b>Baseline <math>k</math><br/>(W/m·K)</b> | <b>Self-healing <math>k</math><br/>(W/m·K)</b> |
|-----------------|--------------------------------------------|------------------------------------------------|
| 0               | 44.2                                       | 23.5                                           |
| 30              | 46.5                                       | 24.1                                           |
| 60              | 49.2                                       | 24.8                                           |
| 90              | 52.4                                       | 25.4                                           |
| 120             | 55.8                                       | 25.9                                           |
| 180             | 61.2                                       | 26.5                                           |
| 240             | 64.5                                       | 27.0                                           |
| 300             | 66.8                                       | 27.3                                           |

## 17 S17. Phase Stability Diagram Construction

### 17.1 S17.1 Thermochemical Database Sources

Table 49: Database sources

| Source                        | Version |
|-------------------------------|---------|
| NIST JANAF                    | 2022    |
| SGTE Pure Substance Database  | v5.1    |
| NIST Ceramic Phase Diagram DB | v5.2    |
| FactSage FactPS               | v7.3    |

### 17.2 S17.2 Equilibrium Oxygen Partial Pressure Calculation

For reaction  $\text{ZrB}_2 + 2.5 \text{O}_2 \rightleftharpoons \text{ZrO}_2 + \text{B}_2\text{O}_3$ :

$$K_{eq} = \exp(-\Delta G/RT) = \frac{1}{P(\text{O}_2)^{2.5}} \quad (27)$$

At  $T = 2073 \text{ K}$ ,  $\Delta G = -342 \text{ kJ/mol}$ :

$$K_{eq} = \exp\left(\frac{342,000}{8.314 \times 2073}\right) = 4.12 \times 10^8 \quad (28)$$

$$P(\text{O}_2) = (1/K_{eq})^{0.4} = 1.2 \times 10^{-4} \text{ atm} \quad (29)$$

### 17.3 S17.3 Transition Boundaries Summary (T = 2073 K)

Table 50: Phase transition boundaries

| Reaction                                                       | $\log_{10} P(\text{O}_2)$ |
|----------------------------------------------------------------|---------------------------|
| $\text{ZrB}_2 \rightarrow \text{ZrO}_2 + \text{B}_2\text{O}_3$ | -3.92                     |
| $\text{MoSi}_2 \rightarrow \text{MoO}_3 + 2\text{SiO}_2$       | -5.82                     |
| $\text{ZrSi}_2 \rightarrow \text{ZrO}_2 + 2\text{SiO}_2$       | -6.15                     |
| $\text{ZrO}_2 + \text{SiO}_2 \rightarrow \text{ZrSiO}_4$       | -7.28                     |
| $\text{MoO}_3(\text{s}) \rightarrow \text{MoO}_3(\text{g})$    | -2.14 (at 2073 K)         |

## 18 S18. TTT Diagram Calculation Methodology

### 18.1 S18.1 Kinetic Model for Healing

$$t_{\text{heal}}(T) = t_0 \exp\left(\frac{E_a}{RT}\right) \exp\left(\frac{\Delta H_{\text{vap}}}{R(T_{\text{ref}} - T)}\right) \quad (30)$$

Fitted parameters:

$$t_0 = 1.2 \times 10^{-6} \text{ s} \quad (31)$$

$$E_a = 220 \pm 12 \text{ kJ/mol} \quad (32)$$

$$\Delta H_{\text{vap}} = 85 \pm 8 \text{ kJ/mol} \quad (33)$$

$$T_{\text{ref}} = 2100 \text{ K} \quad (34)$$

### 18.2 S18.2 TTT Data Points (N = 3 per temperature)

**Table 51:** Healing time vs. temperature

| Temperature (°C) | Mean $t_{\text{heal}}$ (s) | Std dev (s) |
|------------------|----------------------------|-------------|
| 1500             | 245                        | 12          |
| 1550             | 210                        | 11          |
| 1600             | 172                        | 9           |
| 1650             | 135                        | 7           |
| 1700             | 98                         | 5           |
| 1750             | 68                         | 4           |
| 1800             | 48                         | 3           |
| 1850             | 52                         | 3           |
| 1900             | 62                         | 4           |
| 1950             | 76                         | 5           |
| 2000             | 94                         | 6           |

### 18.3 S18.3 Nose Position Calculation

Set  $dt_{\text{heal}}/dT = 0$ :

$$\frac{d}{dT} \left[ t_0 \exp\left(\frac{E_a}{RT}\right) \exp\left(\frac{\Delta H_{\text{vap}}}{R(T_{\text{ref}} - T)}\right) \right] = 0 \quad (35)$$

Solving numerically:

$$T_{\text{nose}} = 1803 \pm 12 \text{ K} \quad (1530 \pm 12^\circ\text{C}), \quad t_{\text{nose}} = 46 \pm 4 \text{ s} \quad (36)$$

## 19 S19. Material Properties Summary Tables

### 19.1 S19.1 Physical Properties at 25°C

**Table 52:** Physical properties of constituent phases at 25°C

| Phase                                 | $\rho$ (g/cm <sup>3</sup> ) | $E$ (GPa) | $\nu$ | $\alpha$ ( $\times 10^{-6}$ K <sup>-1</sup> ) |
|---------------------------------------|-----------------------------|-----------|-------|-----------------------------------------------|
| ZrB <sub>2</sub>                      | 6.09                        | 489       | 0.15  | 6.2                                           |
| SiC ( $\alpha$ )                      | 3.21                        | 410       | 0.14  | 4.5                                           |
| ZrSi <sub>2</sub>                     | 4.88                        | 185       | 0.17  | 8.2                                           |
| MoSi <sub>2</sub>                     | 6.23                        | 435       | 0.15  | 8.1                                           |
| ZrO <sub>2</sub> (m)                  | 5.68                        | 210       | 0.28  | 7.5                                           |
| SiO <sub>2</sub> (quartz)             | 2.65                        | 72        | 0.17  | 0.55                                          |
| B <sub>2</sub> O <sub>3</sub> (glass) | 2.46                        | 30        | 0.27  | 2.8                                           |
| MoO <sub>3</sub>                      | 4.69                        | —         | —     | —                                             |
| ZrSiO <sub>4</sub>                    | 4.56                        | 210       | 0.21  | 4.2                                           |

### 19.2 S19.2 Thermal Properties at 1800°C

**Table 53:** Thermal properties at 1800°C

| Phase                             | $k$ (W/m·K) | $c_p$ (J/g·K) | Emissivity $\epsilon$ |
|-----------------------------------|-------------|---------------|-----------------------|
| ZrB <sub>2</sub>                  | 72          | 0.62          | 0.65                  |
| SiC                               | 35          | 1.12          | 0.85                  |
| ZrSi <sub>2</sub>                 | 18          | 0.48          | 0.42                  |
| MoSi <sub>2</sub>                 | 25          | 0.55          | 0.68                  |
| ZrO <sub>2</sub>                  | 2.5         | 0.58          | 0.30                  |
| SiO <sub>2</sub> (glass)          | 1.2         | 1.15          | 0.35                  |
| B <sub>2</sub> O <sub>3</sub> (l) | 0.8         | 1.45          | 0.25                  |
| ZrSiO <sub>4</sub>                | 2.1         | 0.65          | 0.55                  |

### 19.3 S19.3 Mechanical Properties at 1800°C

**Table 54:** Mechanical properties at 1800°C

| <b>Phase</b>          | $\sigma_f$ (MPa) | $K_{IC}$<br>(MPa·m <sup>1/2</sup> ) | $H_V$ (GPa) |
|-----------------------|------------------|-------------------------------------|-------------|
| ZrB <sub>2</sub>      | 450              | 3.8                                 | 12.5        |
| SiC                   | 350              | 3.2                                 | 9.8         |
| ZrSi <sub>2</sub>     | 180              | 2.5                                 | 7.2         |
| MoSi <sub>2</sub>     | 320              | 3.0                                 | 8.9         |
| Composite (optimized) | 320              | 4.1                                 | 11.2        |

## 20 S20. Uncertainty Quantification and Error Analysis

### 20.1 S20.1 Sources of Uncertainty

**Table 55:** Identified uncertainty sources and magnitudes

| Source                              | Type       | Estimated magnitude |
|-------------------------------------|------------|---------------------|
| DFT exchange-correlation functional | Systematic | $\pm 8$ kJ/mol      |
| Force field approximation (ReaxFF)  | Systematic | $\pm 5\%$           |
| Finite size effects (MD)            | Random     | $\pm 3\%$           |
| Sampling error (phase-field)        | Random     | $\pm 2\%$           |
| Material property variability       | Random     | $\pm 10\%$          |
| Numerical discretization            | Systematic | $\pm 1\%$           |

### 20.2 S20.2 Monte Carlo Uncertainty Propagation (10,000 samples)

**Table 56:** Key output uncertainties

| Output quantity                        | Mean               | 95% CI       | Relative uncertainty |
|----------------------------------------|--------------------|--------------|----------------------|
| $t_{\text{heal}}$ at 1800°C            | 47.6 s             | (43.8, 51.2) | $\pm 7.8\%$          |
| Strength retention (optimized)         | 94.4%              | (91.2, 97.8) | $\pm 3.5\%$          |
| $k$ at 1800°C (post-re-entry)          | 2.45 W/m·K         | (2.31, 2.59) | $\pm 5.7\%$          |
| Recession depth                        | 0.31 mm            | (0.27, 0.36) | $\pm 14.5\%$         |
| Critical pore radius $R_{\text{crit}}$ | 2.31 $\mu\text{m}$ | (2.12, 2.49) | $\pm 8.0\%$          |

### 20.3 S20.3 Sobol Sensitivity Indices for $t_{\text{heal}}$

**Table 57:** Sensitivity indices

| Parameter                 | Sensitivity index $S_i$ |
|---------------------------|-------------------------|
| MoSi <sub>2</sub> content | 0.62                    |
| Diffusion barrier $E_a$   | 0.18                    |
| Melt viscosity            | 0.12                    |
| Contact angle $\theta$    | 0.05                    |
| Surface tension $\gamma$  | 0.02                    |
| All others                | 0.01                    |

MoSi<sub>2</sub> content is the dominant factor controlling healing kinetics.

## 20.4 S20.4 Grid Convergence Study (Phase-Field)

**Table 58:** Grid convergence for  $t_{\text{heal}}$

| <b>Grid spacing</b><br>$\Delta x$ (nm) | $t_{\text{heal}}$ (s) | <b>Relative error</b> |
|----------------------------------------|-----------------------|-----------------------|
| 50                                     | 55.2                  | +16%                  |
| 25                                     | 49.8                  | +4.6%                 |
| 10                                     | 47.6                  | 0% (reference)        |
| 5                                      | 47.3                  | -0.6%                 |

$\Delta x = 10$  nm yields converged results (error < 1% relative to  $\Delta x = 5$  nm).

## 20.5 S20.5 Reproducibility Statement

All simulations were performed with  $N = 5$  independent replicates (random initial seeds, random microstructure realizations) unless otherwise noted. Mean values and standard deviations are reported throughout. Complete input files, parameter sets, and raw data are available from the corresponding author upon reasonable request.

*End of Supplementary Materials.*
